# Supplementary material for: In silico analysis of SOD1 aggregation inhibition modes of tertiary amine pyrazolone and pyrano coumarin ferulate as ALS drug candidates
Source: Royal Society of Chemistry journal article supplement (doi:10.1039/d3cp03978a), 2023-01-01
Supplement: d3cp03978a1.pdf [file d3cp03978a1.pdf]

## Supplementary Information

### **In silico Analysis of SOD1 Aggregation Inhibition Modes of Tertiary Amine Pyrazolone and Pyrano Coumarin Ferulate as ALS drug candidates**

Aziza Rahman, Bondeepa Saikia, and Anupual Baruah\*

*Department of Chemistry, Dibrugarh University, Dibrugarh, Assam, India, 786004*

The following are the reason for selection of one conformation to be considered for MD simulation from five docked conformations:

- For TAP at dimeric interface: second lowest binding energy; best CF and MBE of the cluster. (The conformation having lowest binding energy has a poor CF of the cluster)
- For TAP at W32 binding site: lowest binding energy; best CF and second best MBE of the cluster
- For TAP at UMP binding site: lowest binding energy; best CF and second best MBE of the cluster
- For PCF at dimeric interface cavity: lowest binding energy; best CF and second best MBE of the cluster
- For PCF at W32 binding site: second lowest binding energy; good CF with one of the best MBE. (The conformation having the lowest binding energy has poor MBE of the cluster, so it is not considered)
- For PCF at UMP binding site: second lowest binding energy; second best CF and best MBE of the cluster. (The conformation having lowest binding energy has poor CF of the cluster)

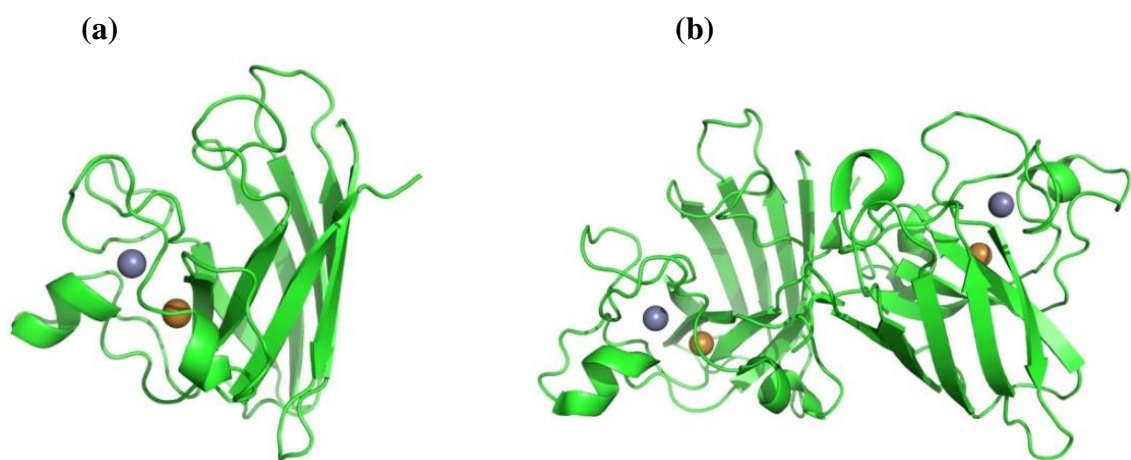

**Figure S1:** G93A mutant (a) monomer (b) dimer

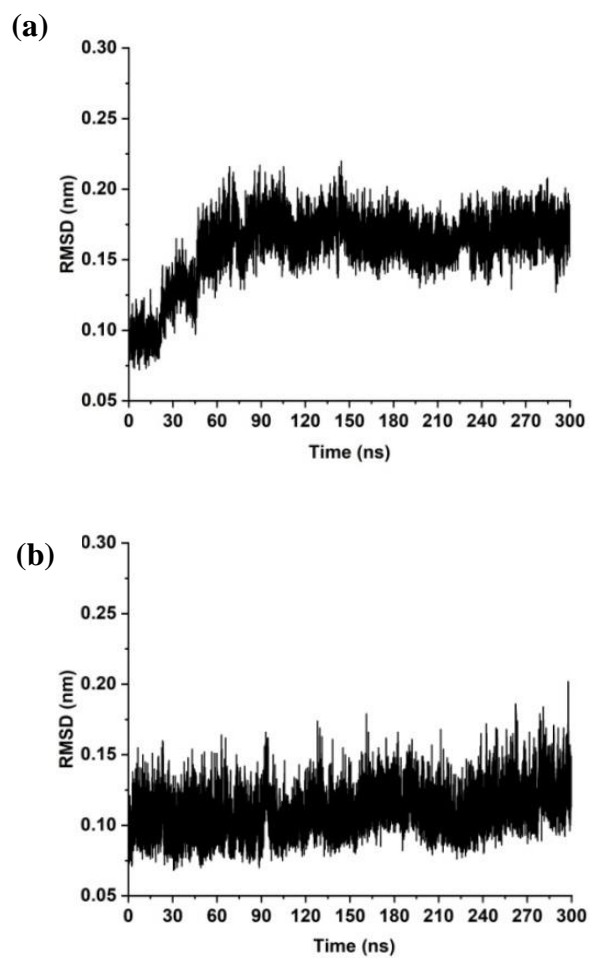

**Figure S2:** RMSD plots of the (a) MT-SOD1 monomer (b) MT-SOD1 dimer

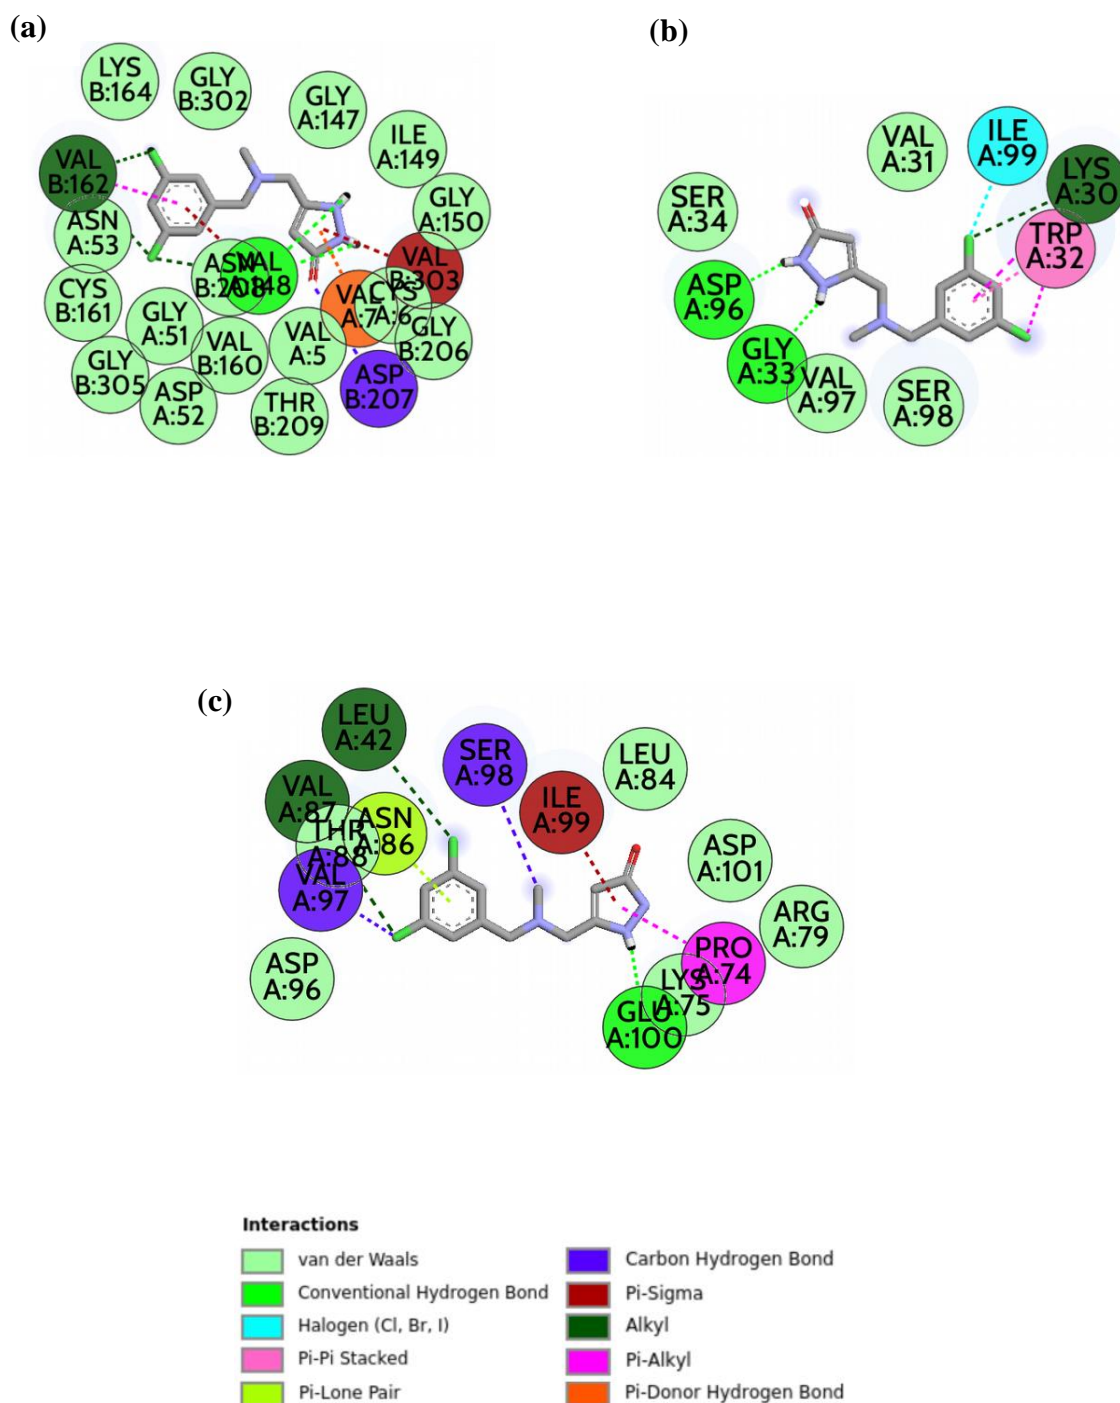

**Figure S3:** Various interactions shown by the best-docked conformers selected for TAP binding to MT-SOD1 at (a) dimeric interface cavity (b) W32 binding site (c) UMP binding site

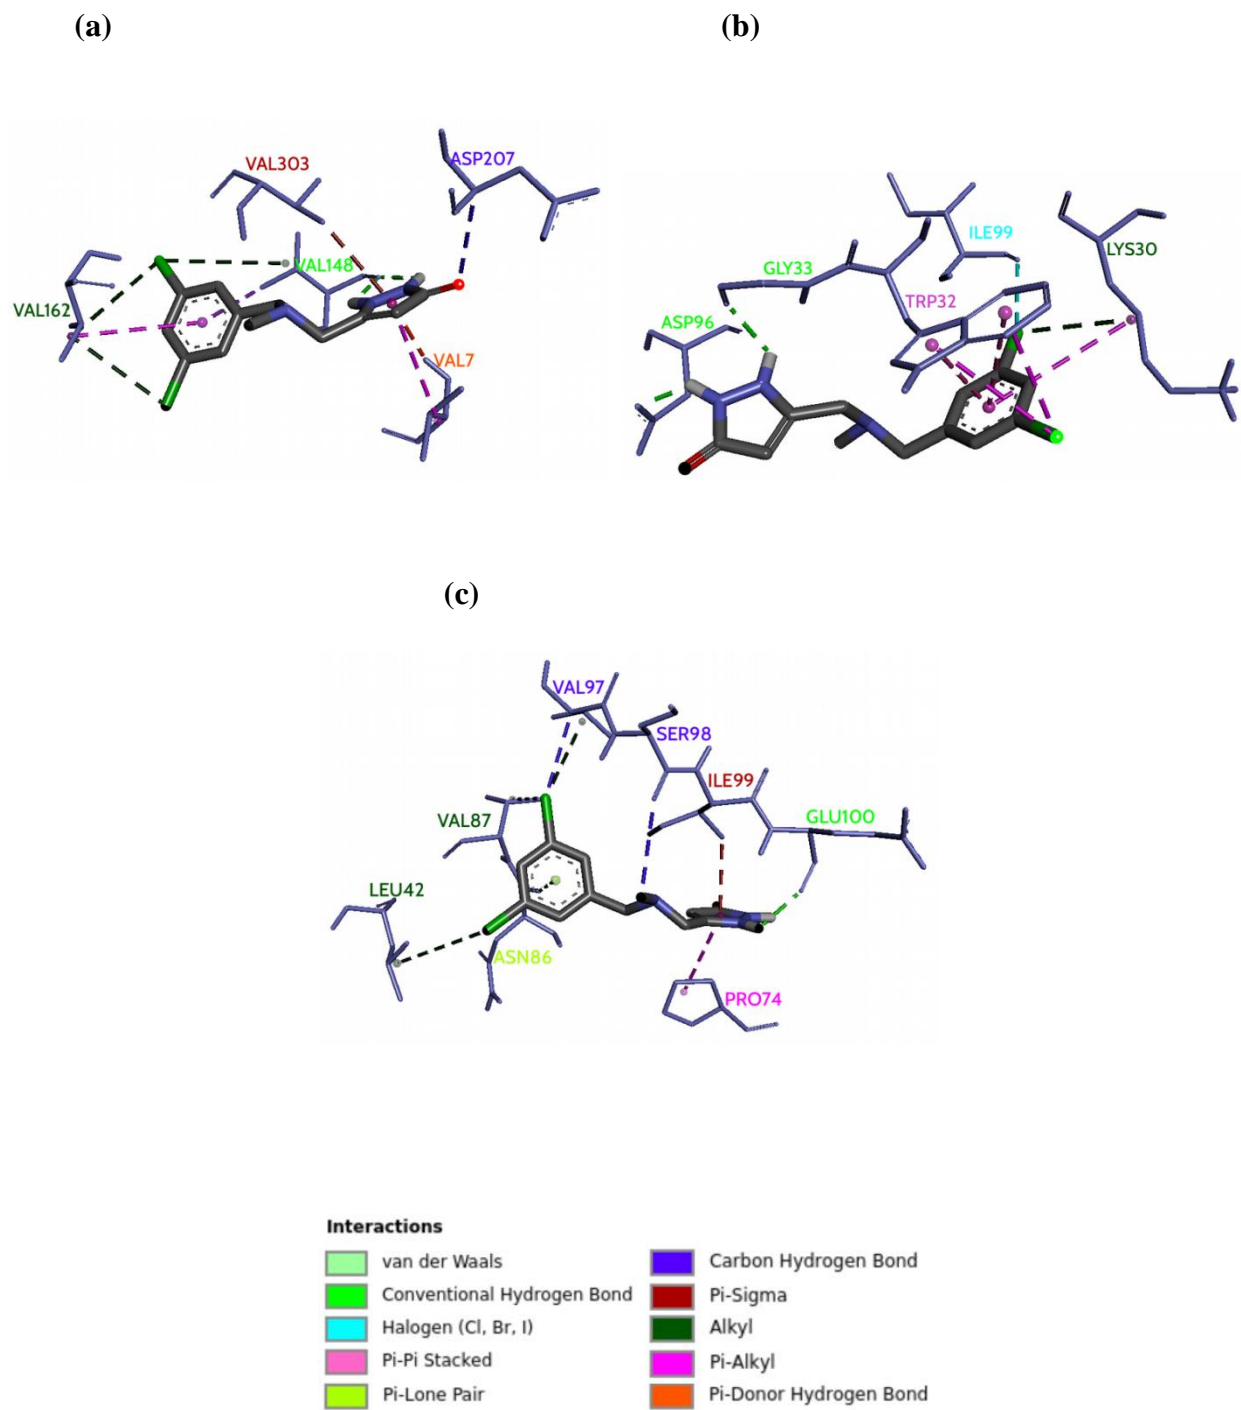

**Figure S4:** 3D representation of the various interactions shown by the best-docked conformers selected for TAP binding to MT-SOD1 at (a) dimeric interface cavity (b) W32 binding site (c) UMP binding site

| Binding site | Interactions                                                                                                            |                     |               |                     |              |                 |                |               |              |                   |
|--------------|-------------------------------------------------------------------------------------------------------------------------|---------------------|---------------|---------------------|--------------|-----------------|----------------|---------------|--------------|-------------------|
|              | Van der waals                                                                                                           | Conventional H-bond | Carbon H-bond | Alkyl               | Pi-Alkyl     | Pi-Donor H-bond | Pi-Sigma       | Pi-Pi Stacked | Pi-Lone Pair | Halogen (Cl,Br,I) |
| At DI        | Val5, Cys6, Gly51, Asp52, Asn53, Gly147, Ile149, Gly150, Val160, Cys161, Lys164, Gly206, Asn208, Thr209, Gly302, Gly305 | Val148              | Asp207        | Val148, Val162,     | Val7, Val162 | Val7            | Val148, Val303 | -             | -            | -                 |
| At W32       | Val31, Ser34, Val97, Ser98                                                                                              | Asp96, Gly33        | -             | Lys30               | Lys30, Trp32 | -               | -              | Trp32         | -            | Ile99             |
| At UMP       | Lys75, Arg79, Leu84, Thr88, Asp96, Asp101                                                                               | Glu100              |               | Leu42, Val87, Val97 | Pro74        |                 | Ile99          | -             | Asn86        | -                 |

**Table S1:** Various interactions shown by the best-docked conformers selected for TAP binding to MT-SOD1 at three different binding sites of SOD1

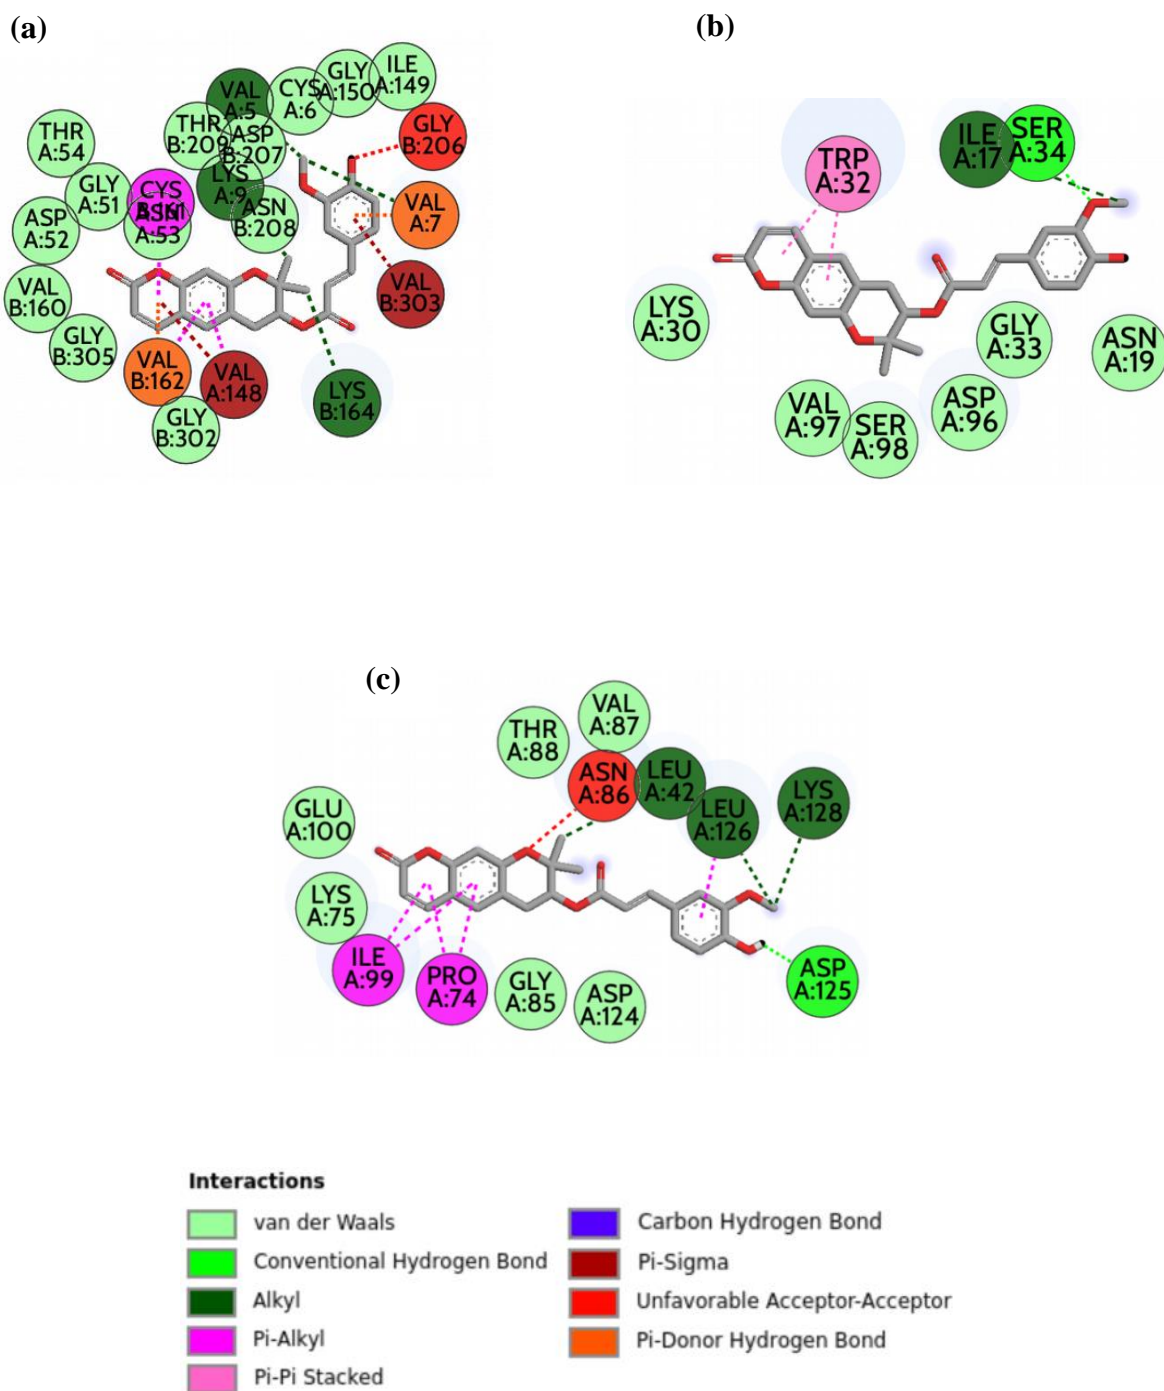

**Figure S5:** Various interactions shown by the best-docked conformers selected for PCF binding to MT-SOD1 at (a) dimeric interface cavity (b) W32 binding site (c) UMP binding site

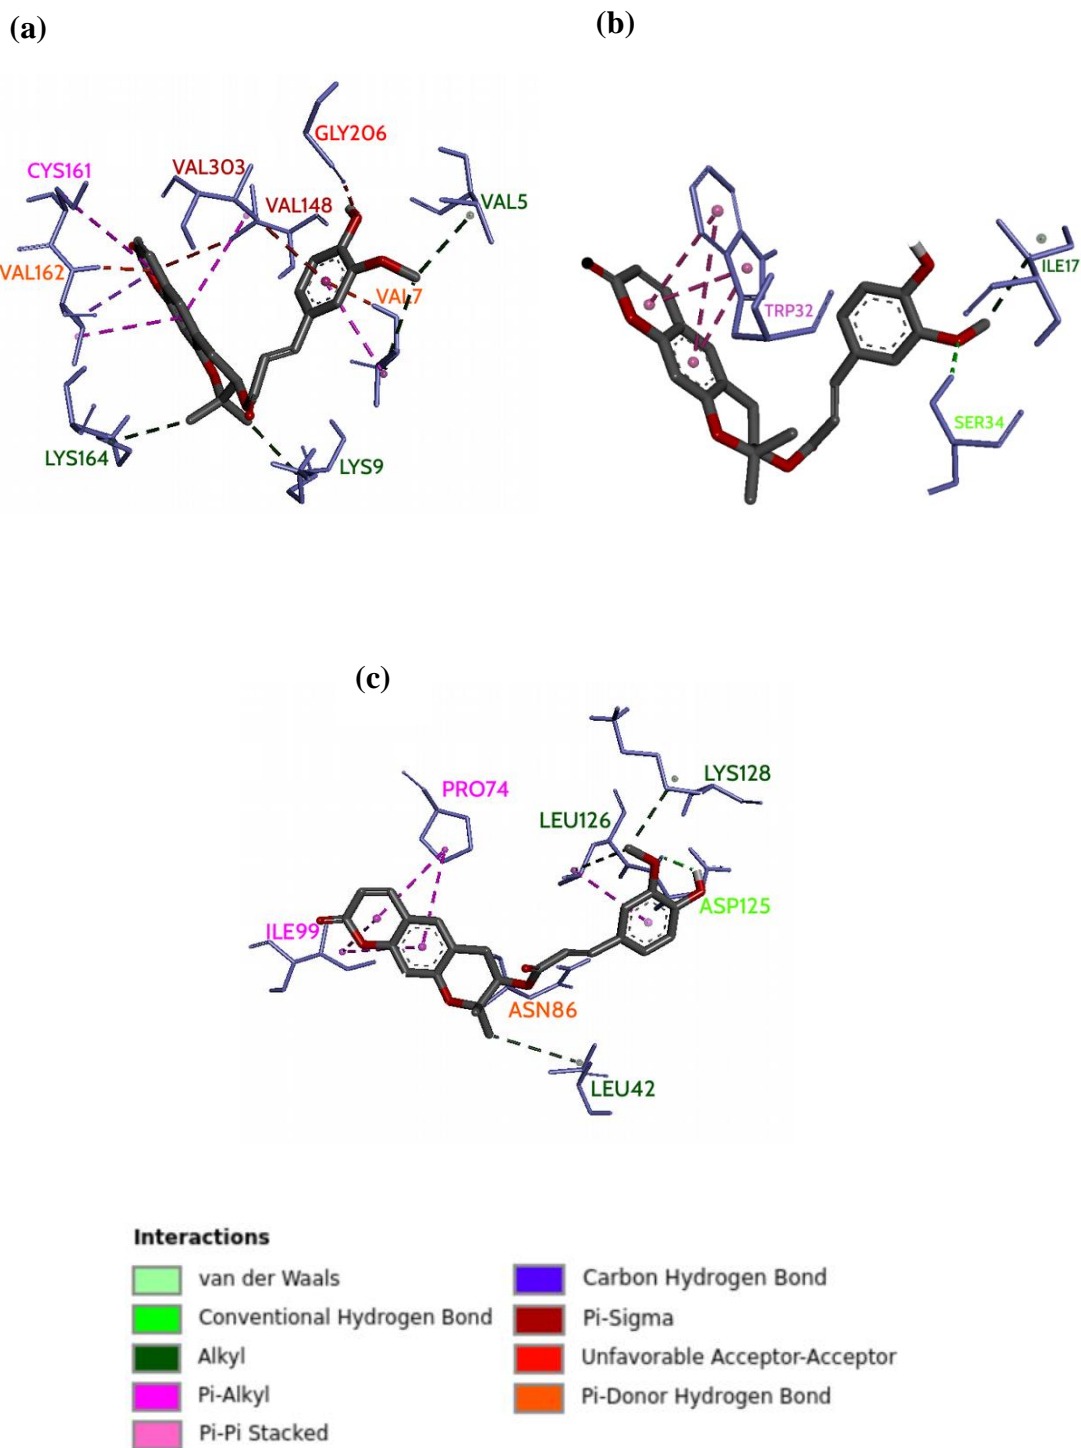

**Figure S6:** 3D representation of various interactions shown by the best-docked conformers selected for PCF binding to MT-SOD1 at (a) dimeric interface cavity (b) W32 binding site (c) UMP binding site

| Binding site | Interactions                                                                                     |                     |               |                       |                              |                 |                        |               |                                |
|--------------|--------------------------------------------------------------------------------------------------|---------------------|---------------|-----------------------|------------------------------|-----------------|------------------------|---------------|--------------------------------|
|              | Van der waals                                                                                    | Conventional H-bond | Carbon H-bond | Alkyl                 | Pi-Alkyl                     | Pi-Donor H-bond | Pi-Sigma               | Pi-Pi Stacked | Unfavourable Acceptor-Acceptor |
| At DI        | Cys6, Gly51, Asp52, Asn53, Thr54, Ile149, Gly150, Val160, Asp207, Asn208, Thr209, Gly302, Gly305 | -                   | -             | Val5, Lys9, Lys164    | Val7, Val148, Cys161, Val162 | Val7, Val162    | Val148, Val162, Val303 | -             | Gly206                         |
| At W32       | Asn19, Lys30, Gly33, Asp96, Val97, Ser98                                                         | Ser34               |               | Ile17                 | -                            | -               | -                      | Trp32         | -                              |
| At UMP       | Lys75, Gly85, Val87, Thr88, Glu100, Asp124                                                       | Asp125              | -             | Leu42, Leu126, Lys128 | Pro74, Ile99, Leu126         | -               | -                      | -             | Asn86                          |

**Table S2:** Various interactions shown by the best-docked conformers selected for PCF binding to MT-SOD1 at three different binding sites of SOD1

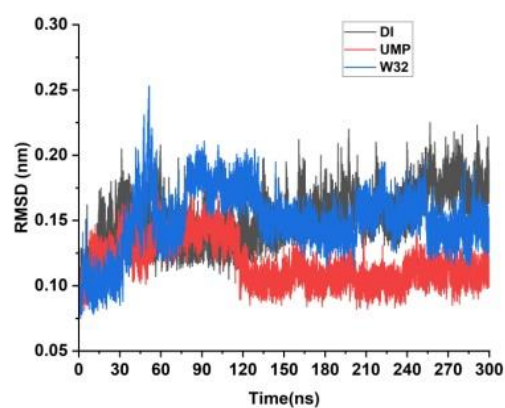

**Figure S7:** RMSD plot of the MT-SOD1-TAP system

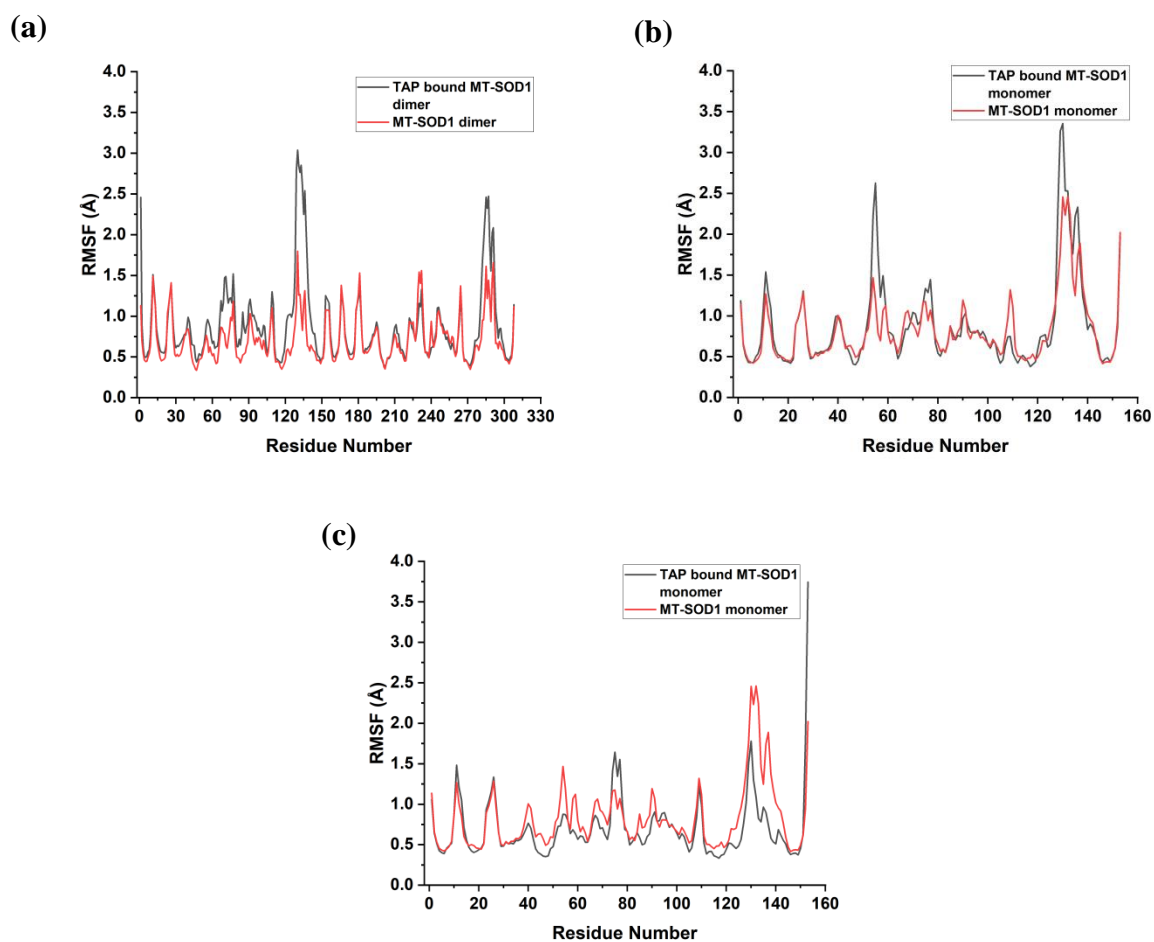

**Figure S8:** Plot depicting residual flexibility of the residues for TAP binding to MT-SOD1 at (a) dimeric interface cavity (b) W32 binding site (c) UMP binding site

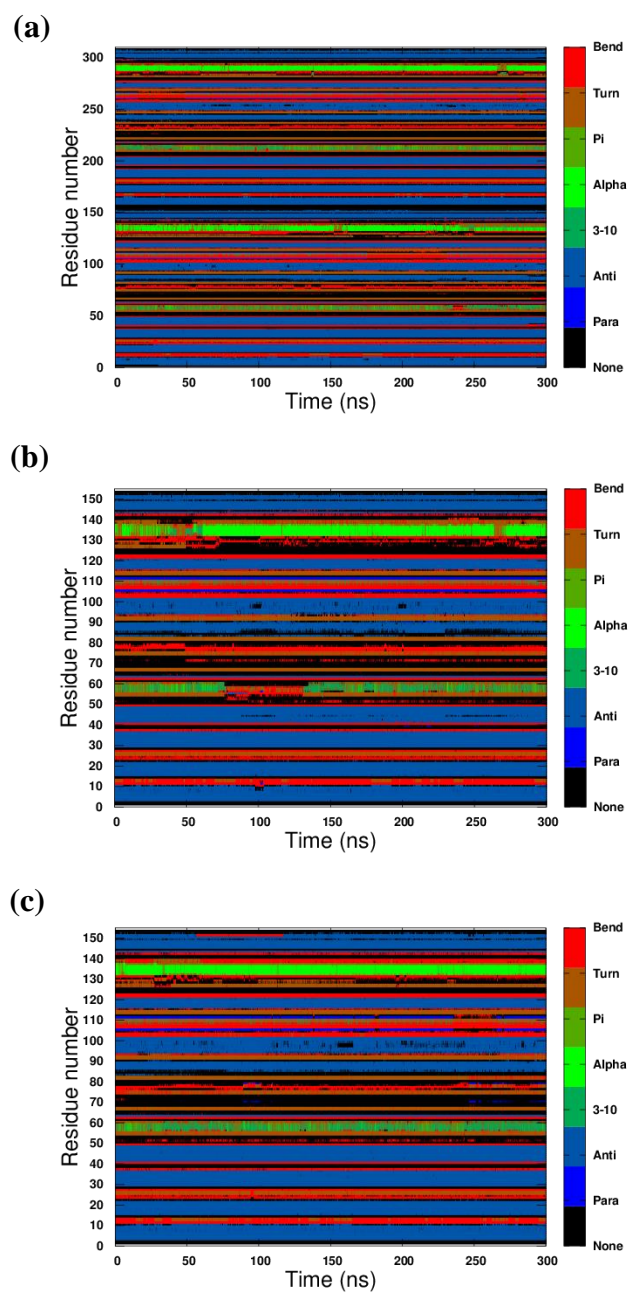

**Figure S9:** Secondary structure propensity analysis of the MD trajectories for TAP binding to MT-SOD1 at (a) dimeric interface cavity (b) W32 binding site (c) UMP binding site

(a)

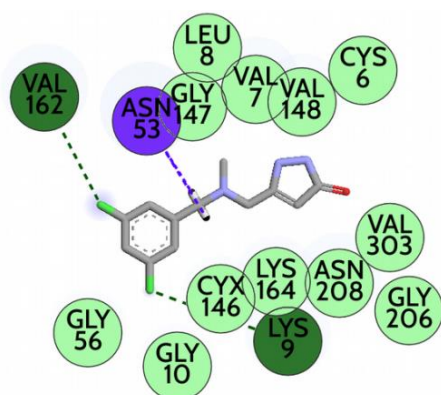

(b)

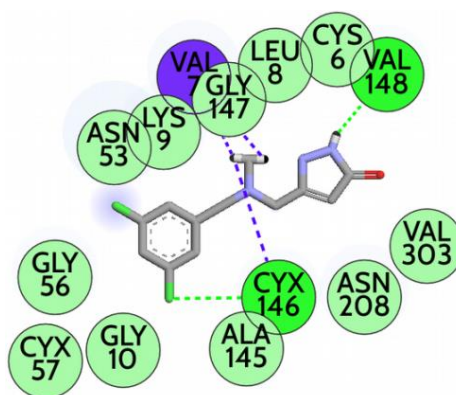

(c)

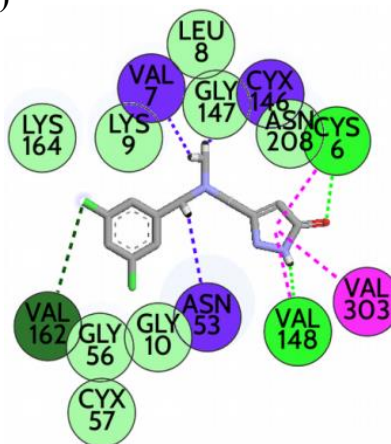

**Interactions**

|                                                                                     |                            |                                                                                     |                        |
|-------------------------------------------------------------------------------------|----------------------------|-------------------------------------------------------------------------------------|------------------------|
| 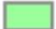 | van der Waals              | 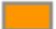 | Pi-Cation              |
| 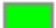 | Conventional Hydrogen Bond | 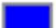 | Pi-Sulfur              |
| 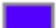 | Carbon Hydrogen Bond       | 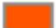 | Pi-Donor Hydrogen Bond |
| 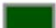 | Alkyl                      | 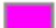 | Pi-Alkyl               |

**Figure S10:** Snapshots of TAP bound to MT-SOD1 at the dimeric interface cavity of SOD1 at (a) 150 ns (b) 200 ns (c) 250 ns of MD simulation

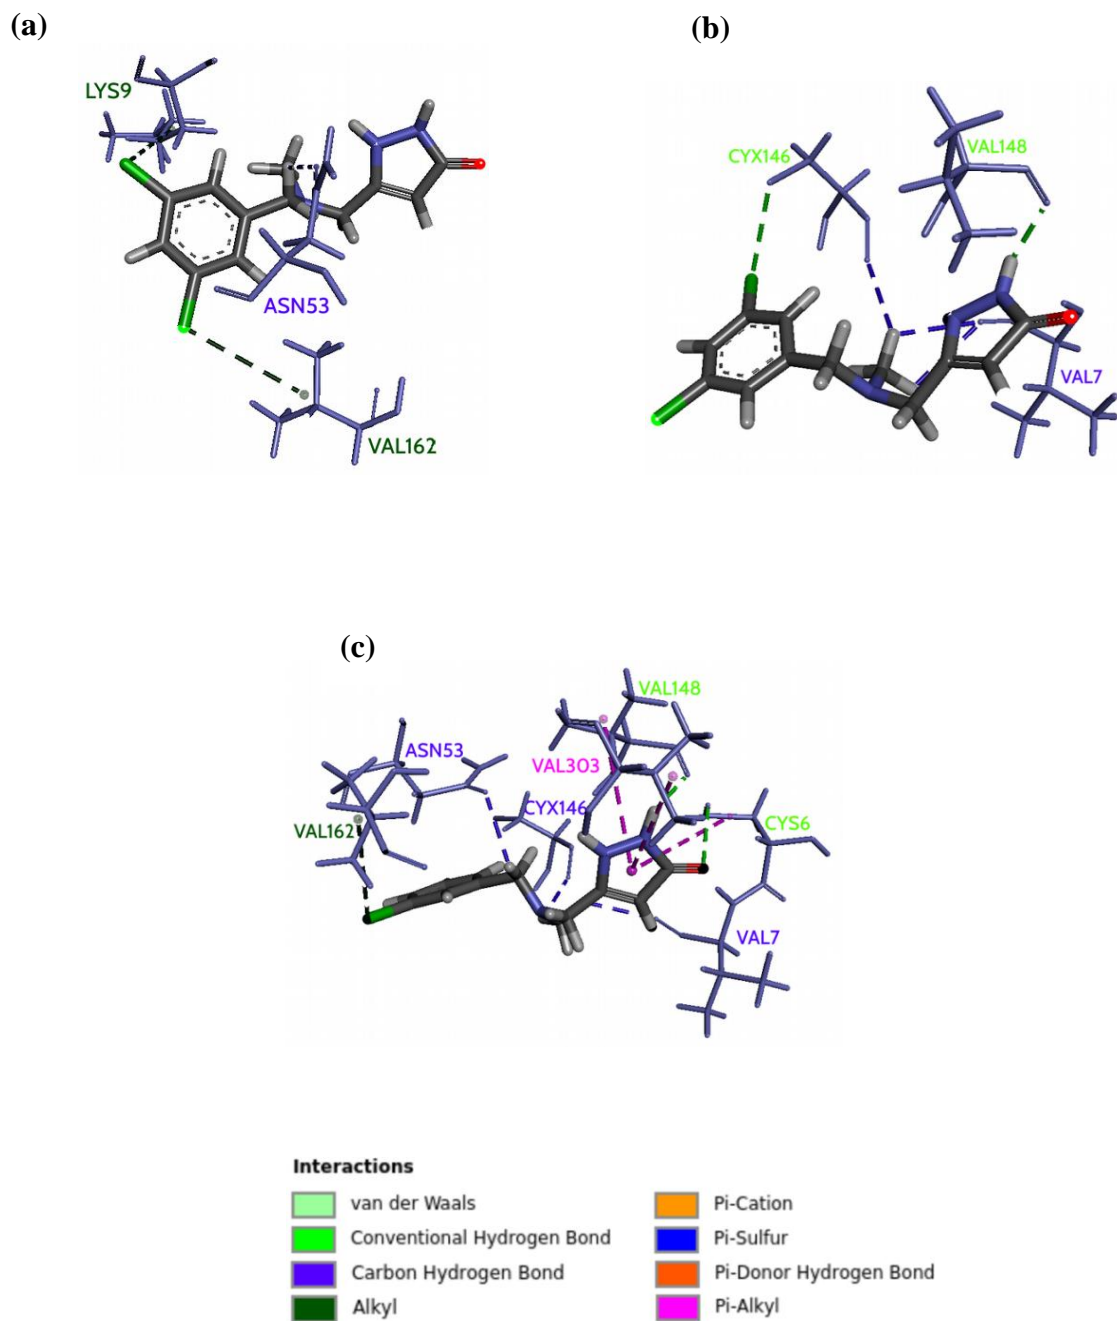

**Figure S11:** 3D representation of protein-ligand interactions shown by TAP bound to MT-SOD1 at the dimeric interface cavity of SOD1 at (a) 150 ns (b) 200 ns (c) 250 ns of MD simulation

| Time      | Interactions                                                                                                      |                            |                           |                   |                              |               |                    |           |
|-----------|-------------------------------------------------------------------------------------------------------------------|----------------------------|---------------------------|-------------------|------------------------------|---------------|--------------------|-----------|
|           | Van der<br>waals                                                                                                  | Conventional<br>H-bond     | Carbon<br>H-bond          | Alkyl             | Pi-Alkyl                     | Pi-<br>Cation | Pi-Donor<br>H-bond | Pi-Sulfur |
| 100<br>ns | Val7, Gly10,<br>Gly56,<br>Cyx57,<br>Cyx146,<br>Val148,<br>Val162,<br>Lys164,<br>Asn208,<br>Val303                 | Cys6                       | Asn53,<br>Gly147          | Lys9              | Lys9                         | -             | -                  | -         |
| 150<br>ns | Cys6, Val7,<br>Leu8, Gly10,<br>Gly56,<br>Cyx146,<br>Gly147,<br>Val148,<br>Lys164,<br>Gly206,<br>Asn208,<br>Val303 | -                          | Asn53                     | Lys9,<br>Val162   | -                            | -             | -                  | -         |
| 200<br>ns | Cys6, Leu8,<br>Lys9,<br>Gly10,<br>Asn53,<br>Gly56,<br>Cyx57,<br>Ala145,<br>Gly147,<br>Asn208,<br>Val303           | Cys146,<br>Val148          | Val7,<br>Cyx146           | -                 | -                            | -             | -                  | -         |
| 250<br>ns | Leu8, Lys9,<br>Gly10,<br>Gly56,<br>Cyx57,<br>Gly147,<br>Lys164,<br>Asn208                                         | Cys6, Val148               | Val7,<br>Asn53,<br>Cyx146 | Val162            | Cys6,<br>Val148,<br>Val303   | -             | -                  | -         |
| 300<br>ns | Val7, Lys9,<br>Gly56,<br>Cyx57,<br>Gly147,<br>Asn208,<br>Gly302                                                   | Cys6,<br>Cyx146,<br>Val148 | Asn53,<br>Lys164          | Val162,<br>Lys164 | Val148,<br>Val162,<br>Val303 | Lys164        | Val148             | Cyx146    |

**Table S3:** Various interactions shown by the TAP bound to MT-SOD1 at the dimeric interface cavity of SOD1

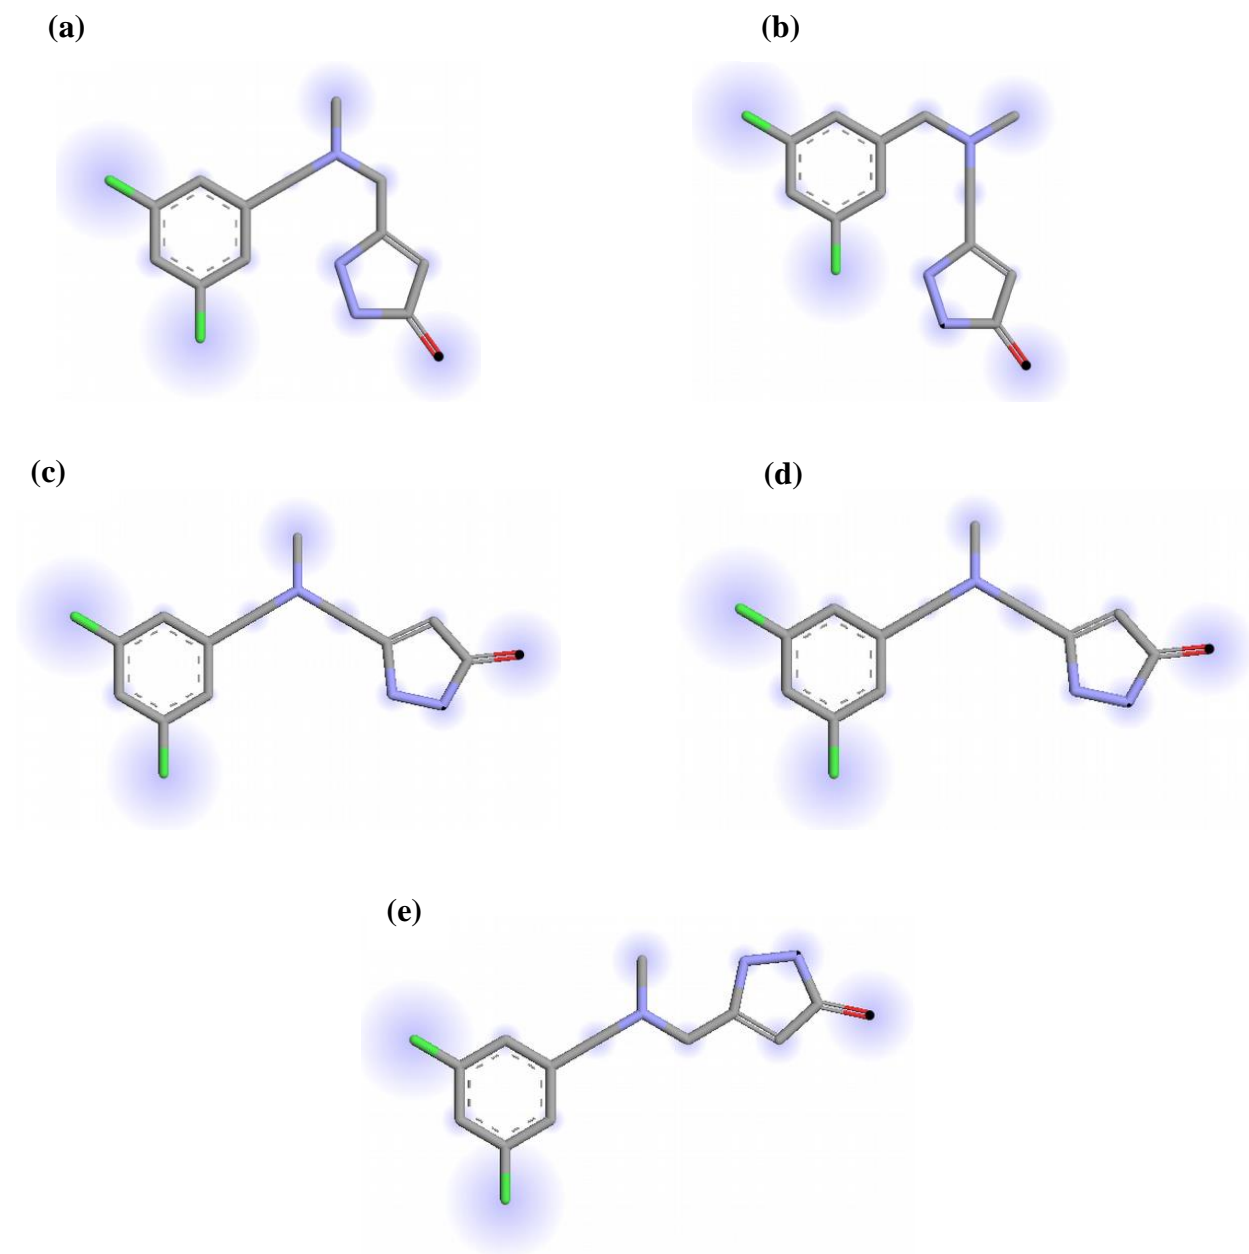

**Figure S12:** Snapshots of TAP bound to MT-SOD1 at the W32 binding site of SOD1 at (a) 100 ns (b) 150 ns (c) 200 ns (d) 250 ns (e) 300 ns of MD simulation

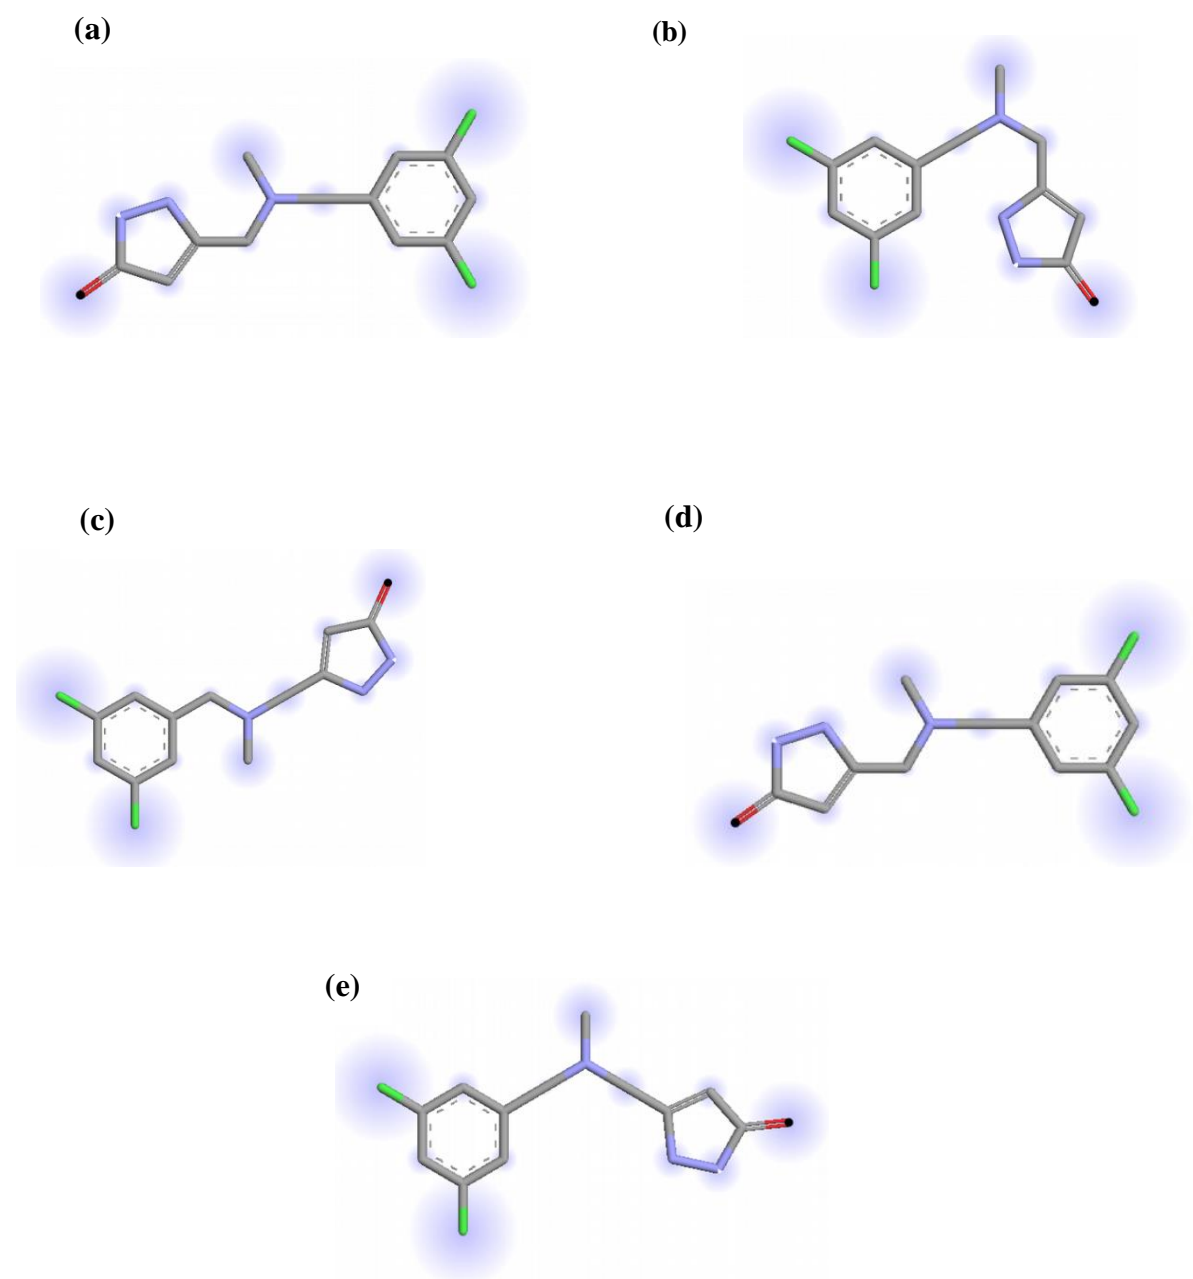

**Figure S13:** Snapshots of TAP bound to MT-SOD1 at the UMP binding site of SOD1 at (a) 100 ns (b) 150 ns (c) 200 ns (d) 250 ns (e) 300 ns of MD simulation

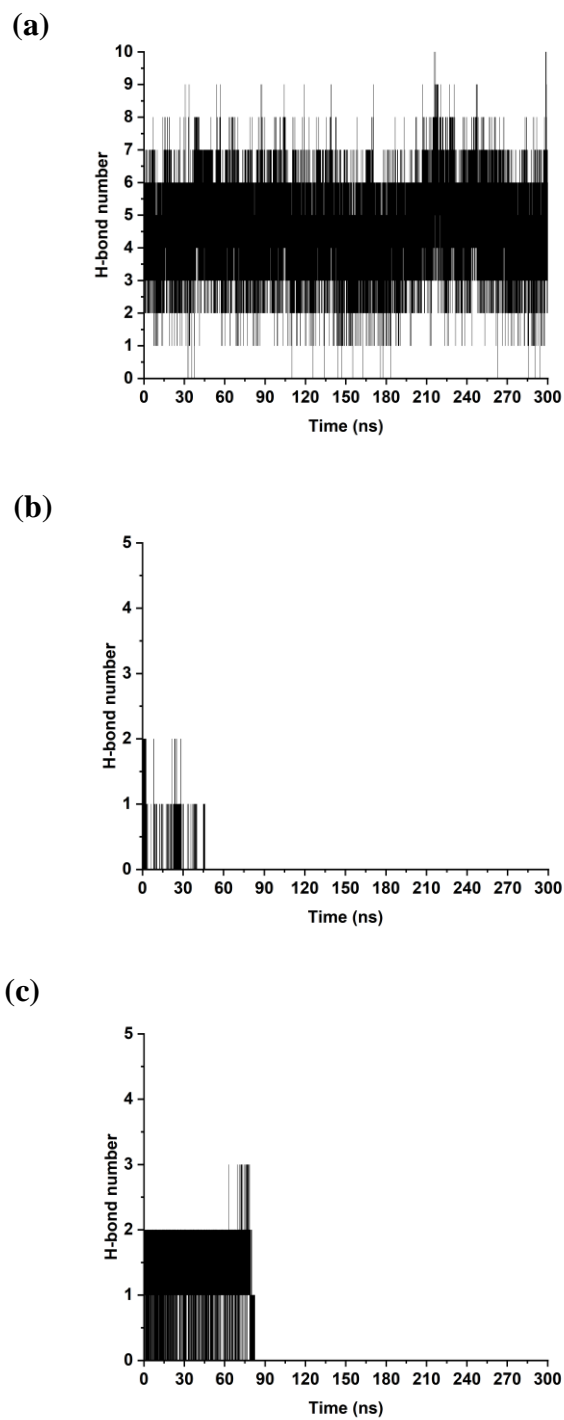

**Figure S14:** H-bond number in the complex MT-SOD1-TAP when the ligand is bound at (a) dimeric interface cavity (b) W32 binding site (c) UMP binding site of SOD1

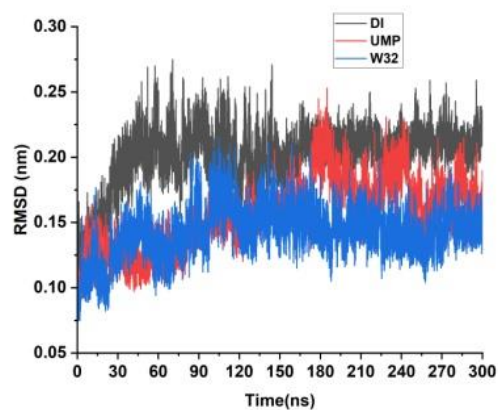

**Figure S15:** RMSD plot of the MT-SOD1-PCF system

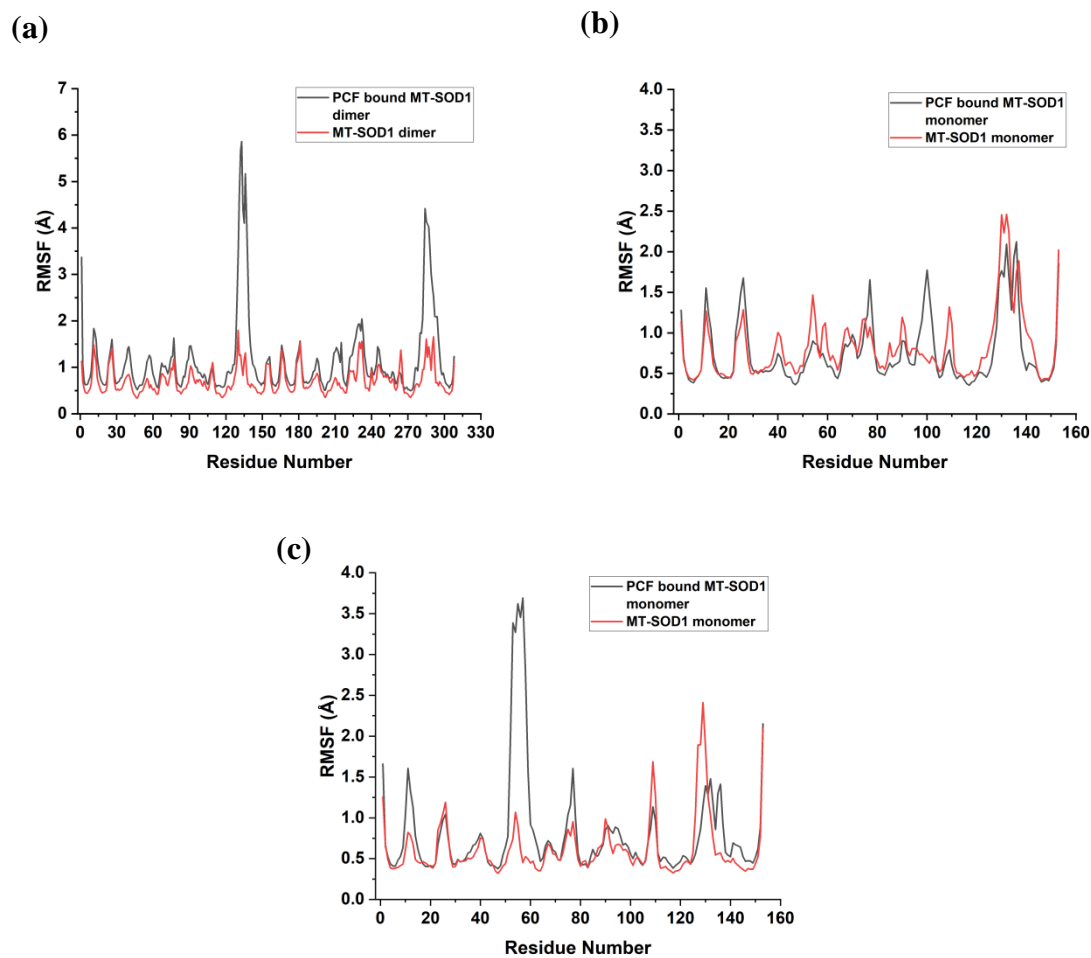

**Figure S16:** Plot depicting residual flexibility of the residues for PCF binding to MT-SOD1 at (a) dimeric interface cavity (b) W32 binding site (c) UMP binding site

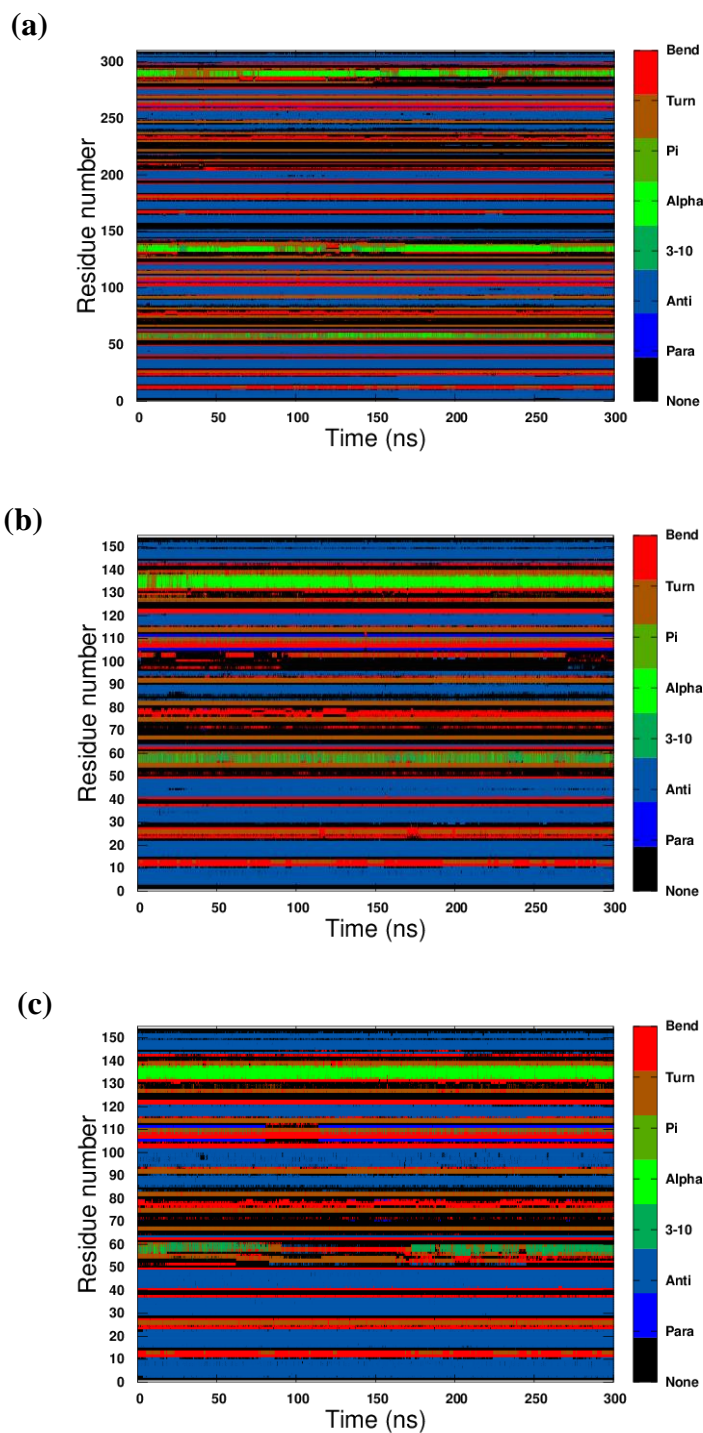

**Figure S17:** Secondary structure propensity analysis of the MD trajectories for PCF binding to MT-SOD1 at (a) dimeric interface cavity (b) W32 binding site (c) UMP binding site

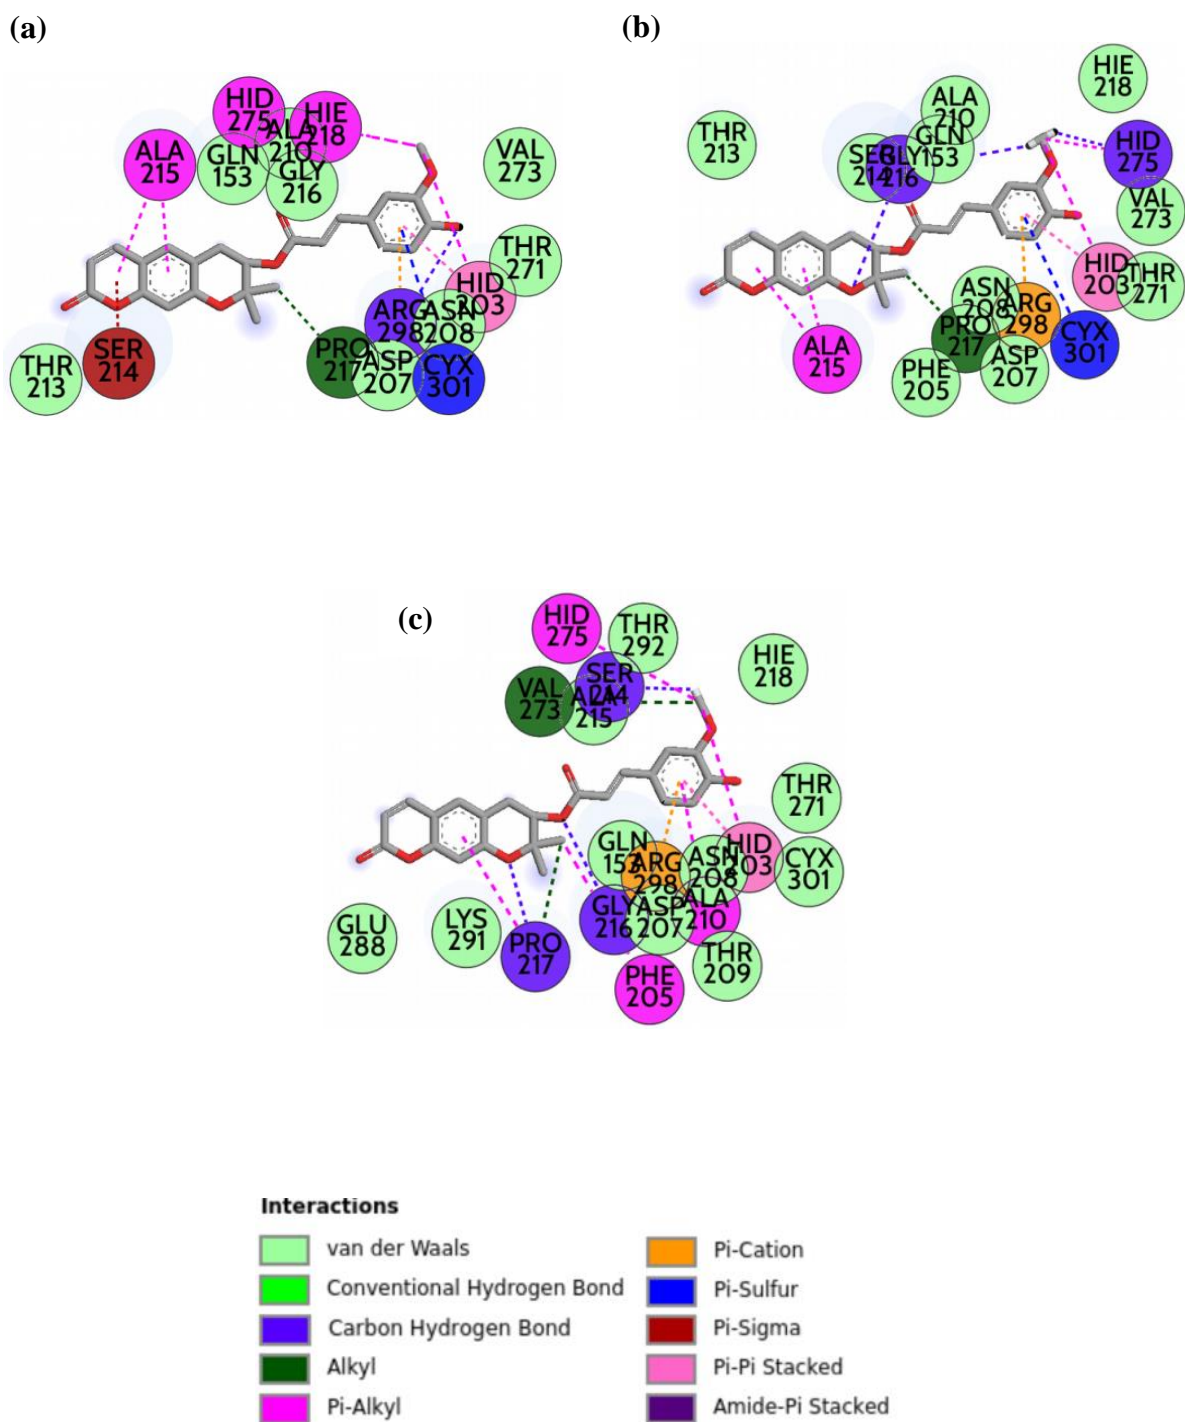

**Figure S18:** Snapshots of PCF bound to MT-SOD1 at the dimeric interface cavity of SOD1 at (a) 150 ns (b) 200 ns (c) 250 ns of MD simulation

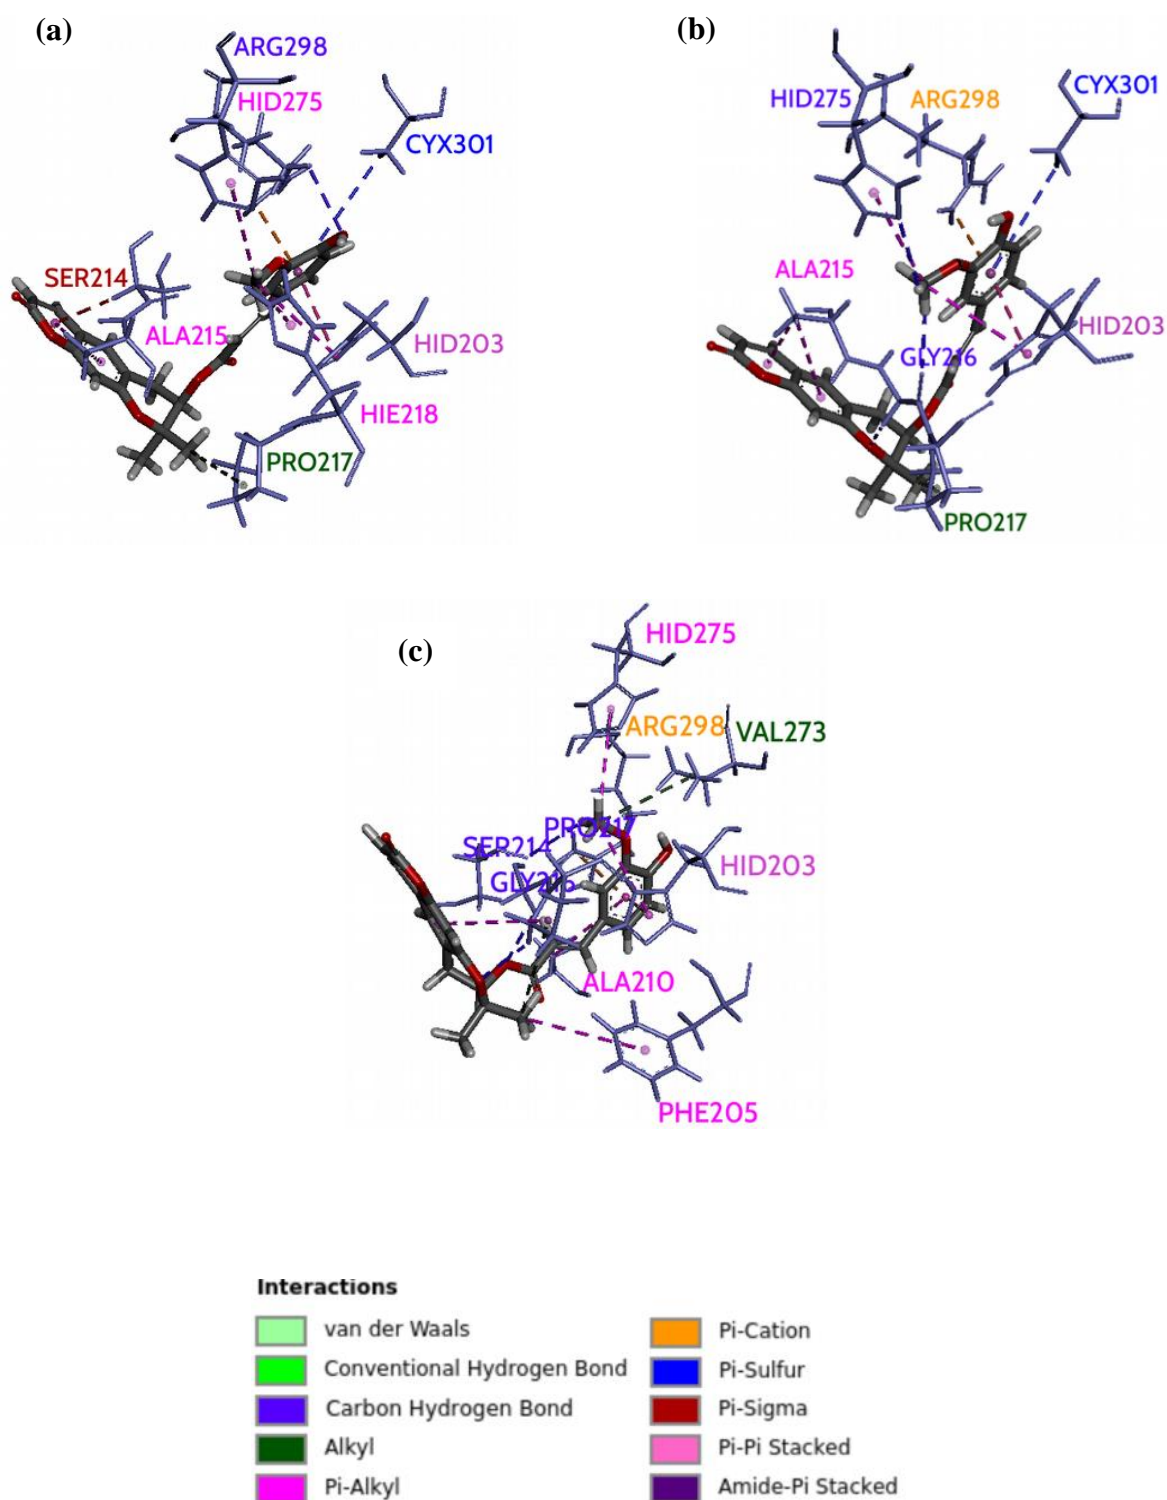

**Figure S19:** 3D representation of protein-ligand interactions shown by PCF bound to MT-SOD1 at the dimeric interface cavity of SOD1 at (a) 150 ns (b) 200 ns (c) 250 ns of MD simulation

| Time      | Interactions                                                                                                                    |                             |                              |                   |                                                     |               |               |              |                      |                             |
|-----------|---------------------------------------------------------------------------------------------------------------------------------|-----------------------------|------------------------------|-------------------|-----------------------------------------------------|---------------|---------------|--------------|----------------------|-----------------------------|
|           | Van der<br>waals                                                                                                                | Convent<br>ional H-<br>bond | Carbon<br>H-bond             | Alkyl             | Pi-Alkyl                                            | Pi-<br>Cation | Pi-<br>Sulfur | Pi-<br>Sigma | Pi-Pi<br>Stacke<br>d | Amide-<br>Pi<br>Stacke<br>d |
| 100<br>ns | Gln153,<br>Phe205,<br>Asp207,<br>Asn208,<br>Ala210,<br>Thr213,<br>Ser214,<br>Hie218,<br>Thr271,<br>Val273,<br>Hid275,<br>Thr292 | -                           | Gly216                       | Pro217            | Ala215,<br>Hid203                                   | Arg298        | Cyx301        | -            | Hid203               | -                           |
| 150<br>ns | Gln153,<br>Asp207,<br>Asn208,<br>Ala210,<br>Thr213,<br>Gly216,<br>Thr271,<br>Val273                                             | -                           | Arg298                       | Pro217            | Ala215,<br>Hid275,<br>Hie218,                       | Arg298        | Cyx301        | Ser214       | Hid203               | -                           |
| 200<br>ns | Gln153,<br>Phe205,<br>Asp207,<br>Asn208,<br>Ala210,<br>Thr213,<br>Ser214,<br>Hie218,<br>Thr271,<br>Val273                       | -                           | Gly216,<br>Hid275            | Pro217            | Hid203,<br>Ala215,<br>Hid275                        | Arg298        | Cyx301        | -            | Hid203               | -                           |
| 250<br>ns | Gln153,<br>Asp207,<br>Asn208,<br>Thr209,<br>Ala215,<br>Hie218,<br>Thr271,<br>Glu288,<br>Lys291,                                 | -                           | Ser214,<br>Gly216,<br>Pro217 | Pro217,<br>Val273 | Hid203,<br>Phe205,<br>Ala210,<br>Pro217,<br>Hid275, | Arg298        | -             | -            | Hid203               | -                           |

|                   |                                                                                                               |               |                           |          |               |               |          |               |               |               |
|-------------------|---------------------------------------------------------------------------------------------------------------|---------------|---------------------------|----------|---------------|---------------|----------|---------------|---------------|---------------|
|                   | <b>Thr292,<br/>Cyx301<br/>Asn208</b>                                                                          |               |                           |          |               |               |          |               |               |               |
| <b>300<br/>ns</b> | <b>Asp207,<br/>Asn208,<br/>Ala210,<br/>Ala215,<br/>Pro217,<br/>His218,<br/>Thr271,<br/>Val273,<br/>Cyx301</b> | <b>Gln153</b> | <b>Ser214,<br/>Gly216</b> | <b>-</b> | <b>His275</b> | <b>Arg298</b> | <b>-</b> | <b>Ser214</b> | <b>His203</b> | <b>Thr213</b> |

**Table S4:** Various interactions shown by the PCF bound to MT-SOD1 at the dimeric interface cavity of SOD1

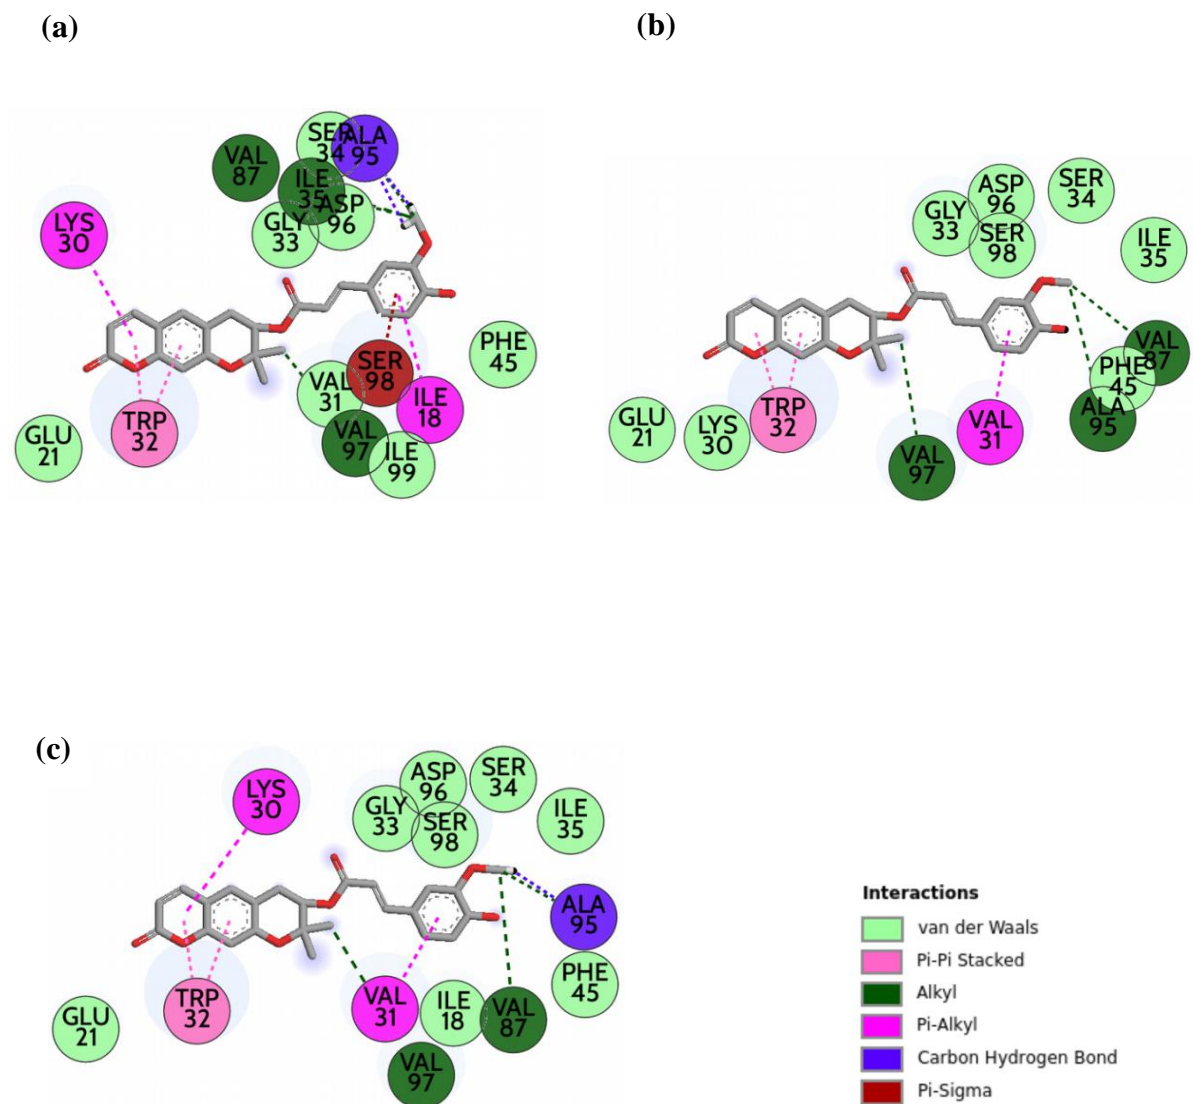

**Figure S20:** Snapshots of PCF bound to MT-SOD1 at the W32 binding site of SOD1 at (a) 150 ns (b) 200 ns (c) 250 ns of MD simulation

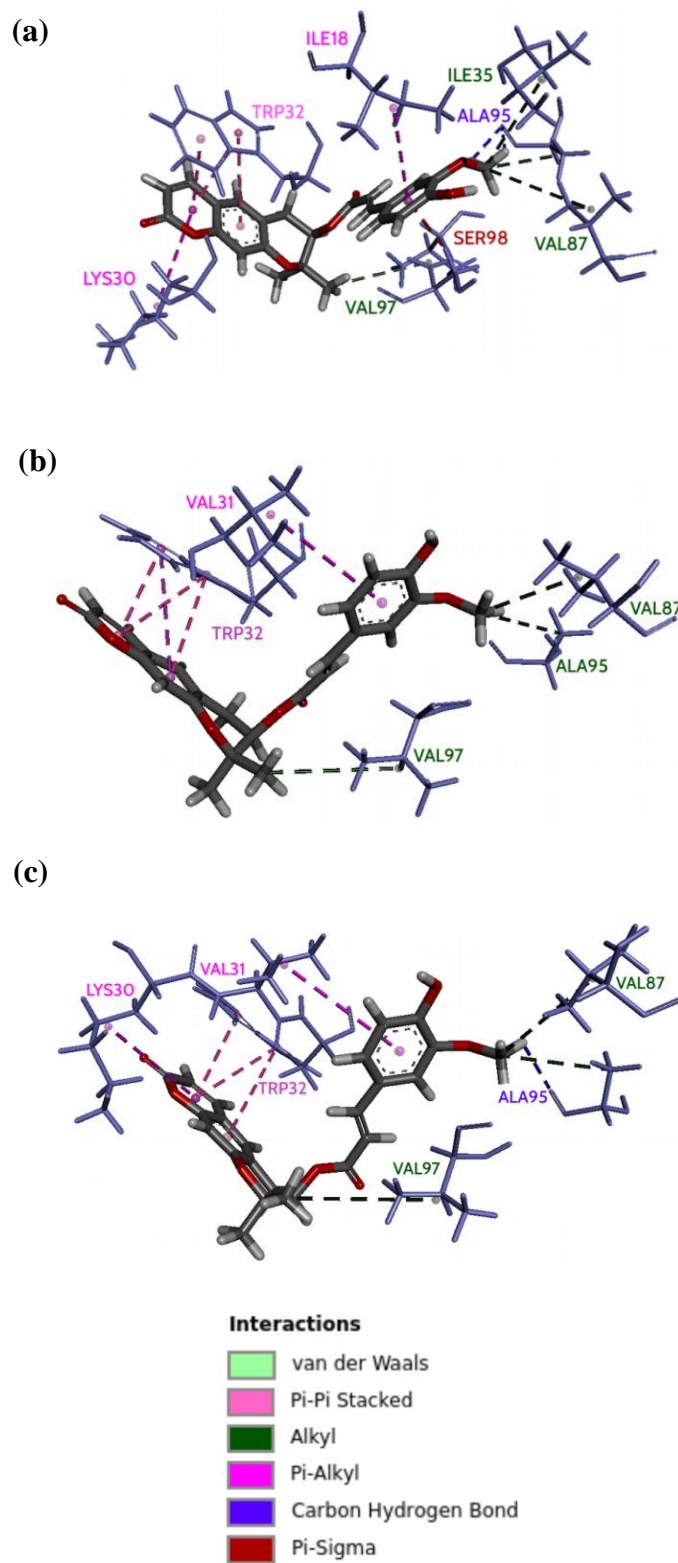

**Figure S21:** 3D representation of protein-ligand interactions shown by PCF bound to MT-SOD1 at the W32 binding site of SOD1 at (a) 150 ns (b) 200 ns (c) 250 ns of MD simulation

| Time   | Interactions                                                         |               |                            |              |          |               |
|--------|----------------------------------------------------------------------|---------------|----------------------------|--------------|----------|---------------|
|        | Van der waals                                                        | Carbon H-bond | Alkyl                      | Pi-Alkyl     | Pi-Sigma | Pi-Pi Stacked |
| 100 ns | Ile18, Glu21, Gly33, Ser34, Ile35, Phe45, Asp96, Ser98, Glu100       | -             | Val87, Val95, Val97        | Lys30, Val31 | -        | Trp32         |
| 150 ns | Glu21, Val31, Gly33, Ser34, Phe45, Asp96, Ile99                      | Ala95         | Ile35, Val87, Ala95, Val97 | Ile18, Lys30 | Ser98    | Trp32         |
| 200 ns | Glu21, Lys30, Gly33, Ser34, Ile35, Phe45, Asp96, Ser98               | -             | Val87, Ala95, Val97        | Val31,       | -        | Trp32         |
| 250 ns | Ile18, Glu21, Gly33, Ser34, Ile35, Phe45, Asp96, Ser98               | Ala95         | Val87, Ala95, Val97        | Lys30, Val31 | -        | Trp32         |
| 300 ns | Ile18, Glu21, Lys30, Gly33, Ser34, Phe45, Val87, Asp96, Val97, Ser98 | Ala95         | Ile35, Ala95               | Val31,       | -        | Trp32         |

**Table S5:** Various interactions shown by the PCF bound to MT-SOD1 at the W32 binding site of SOD1

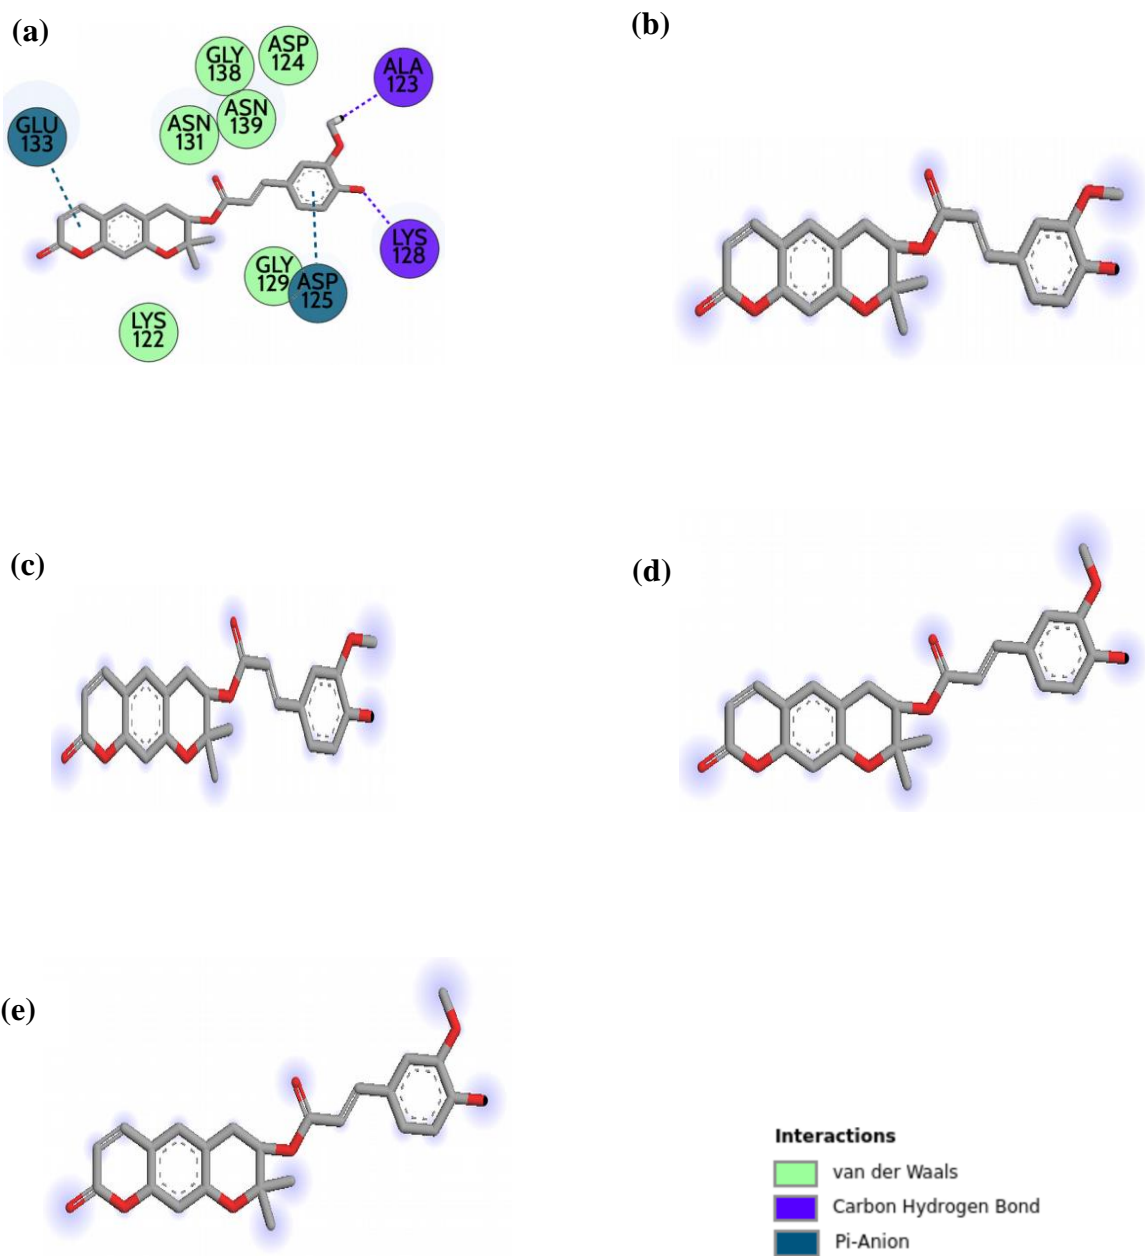

**Figure S22:** Snapshots of PCF bound to MT-SOD1 at the UMP binding site of SOD1 at (a) 100 ns (b) 150 ns (c) 200 ns (d) 250 ns (e) 300 ns of MD simulation

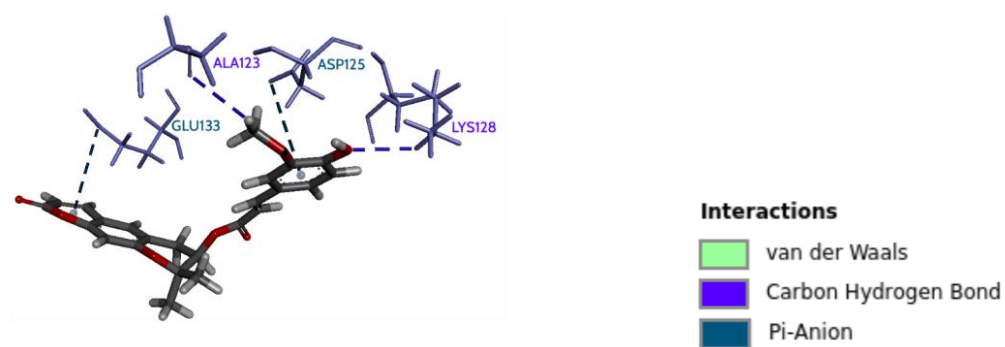

**Figure S23:** 3D representation of protein-ligand interactions shown by PCF bound to MT-SOD1 at the UMP binding site of SOD1 at 100 ns of MD simulation

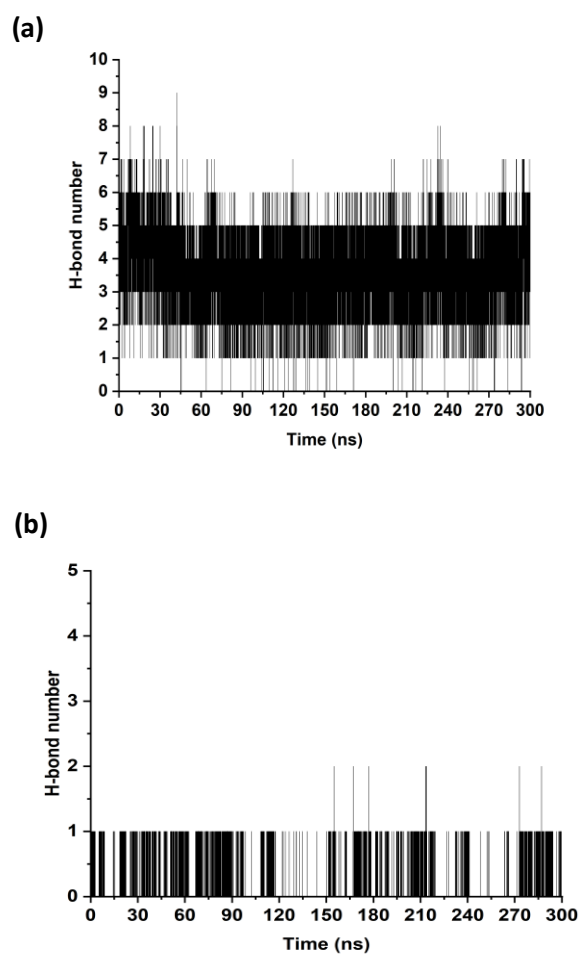

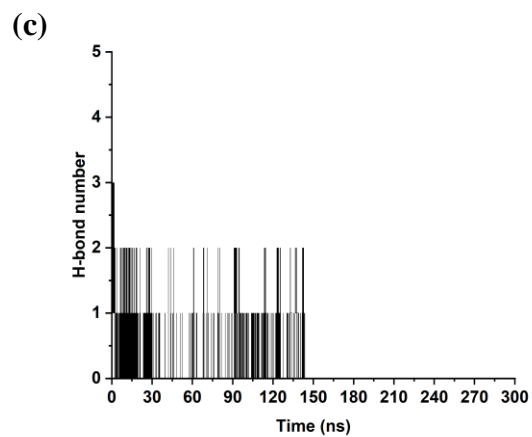

**Figure S24:** H-bond number in the complex MT-SOD1-PCF when the ligand is bound at (a) dimeric interface cavity (b) W32 binding site (c) UMP binding site of SOD1
